# Supplementary material for: Lifetime risks of second primary malignancies after pediatric Hodgkin lymphoma and non-Hodgkin lymphoma
Source: Springer Nature journal article supplement (doi:10.1007/s00432-023-05583-4), 2024-01-27

**Supplemental Table 1.** Risk of second primary malignancies (SPM) among pediatric lymphoma patients by specific lymphoma subtypes.

| Lymphoma subtype                                            | No. of patients | Observed no. of SPM | Expected no. of SPM | SIR    | 95%CI      | Excess risk (per 10,000) | PY at Risk | Mean PY at Risk | Mean Age at Exposure | Mean Age at SPM |
|-------------------------------------------------------------|-----------------|---------------------|---------------------|--------|------------|--------------------------|------------|-----------------|----------------------|-----------------|
| <b>Total</b>                                                | 6984            | 478                 | 109.7               | 4.36#  | 3.98-4.77  | 32.9                     | 112058     | 16.0            | 14.2                 | 35.1            |
| <b>1 Hodgkin Lymphoma</b>                                   | 3983            | 371                 | 78.2                | 4.74#  | 4.27-5.25  | 42.3                     | 69265      | 17.4            | 15.8                 | 36.3            |
| <b>1(a) Classical Hodgkin lymphoma</b>                      | 3828            | 360                 | 77.4                | 4.65#  | 4.19-5.16  | 41.8                     | 67668      | 17.7            | 15.9                 | 36.4            |
| <b>1(a)1 Lymphocyte-rich/mixed cell/lymphocyte depleted</b> | 599             | 57                  | 14.0                | 4.08#  | 3.09-5.29  | 34.2                     | 12575      | 21.0            | 14.6                 | 39.1            |
| 1(a)1.1 Lymphocyte-rich                                     | 144             | 13                  | 3.3                 | 3.94#  | 2.10-6.74  | 30.9                     | 3138       | 21.8            | 14.2                 | 34.0            |
| 1(a)1.2 Mixed cellularity                                   | 429             | 39                  | 9.9                 | 3.93#  | 2.80-5.38  | 32.9                     | 8838       | 20.6            | 14.7                 | 39.2            |
| 1(a)1.3 Lymphocyte-depleted                                 | 26              | 5                   | 0.8                 | 6.69#  | 2.16-15.61 | 70.9                     | 600        | 23.1            | 15.6                 | 51.6            |
| <b>1(a)2 Nodular sclerosis</b>                              | 2826            | 270                 | 57.5                | 4.69#  | 4.15-5.29  | 42.8                     | 49674      | 17.6            | 16.1                 | 36.2            |
| <b>1(a)3 Classical Hodgkin lymphoma, NOS</b>                | 403             | 33                  | 5.9                 | 5.63#  | 3.87-7.91  | 50.1                     | 5419       | 13.5            | 15.8                 | 33.3            |
| <b>1(b) Nodular lymphocyte predominant Hodgkin lymphoma</b> | 155             | 11                  | 0.9                 | 13.00# | 6.48-23.27 | 63.6                     | 1598       | 10.3            | 14.1                 | 35.0            |
| <b>2 Non-Hodgkin lymphoma</b>                               | 2995            | 107                 | 31.5                | 3.48#  | 2.83-4.23  | 17.7                     | 42781      | 14.1            | 12.1                 | 30.7            |
| <b>2(a) Non-Hodgkin lymphoma, B-cell</b>                    | 1880            | 68                  | 22.9                | 2.97#  | 2.31-3.77  | 15.7                     | 28793      | 15.3            | 12.5                 | 33.0            |
| <b>2(a)1 Precursor Non-Hodgkin lymphoma, B-cell</b>         | 119             | 2                   | 0.2                 | 11.17# | 1.25-40.32 | 25.3                     | 720        | 6.1             | 8.5                  | 9.2             |
| <b>2(a)2 Mature Non-Hodgkin lymphoma, B-cell</b>            | 1461            | 50                  | 17.6                | 2.84#  | 2.11-3.75  | 14.4                     | 22447      | 15.4            | 12.9                 | 33.2            |
| 2(a)2.1 Mantle cell lymphoma                                | 24              | 4                   | 0.6                 | 6.75#  | 1.82-17.29 | 62.5                     | 545        | 22.7            | 9.9                  | 52.4            |
| 2(a)2.2 Diffuse large B-cell lymphoma (DLBCL)               | 711             | 29                  | 10.7                | 2.72#  | 1.82-3.91  | 16.3                     | 11252      | 15.8            | 14.7                 | 30.3            |
| 2(a)2.3 Burkitt lymphoma/leukemia                           | 568             | 12                  | 4.6                 | 2.63#  | 1.36-4.60  | 8.7                      | 8571       | 15.1            | 10.2                 | 31.0            |
| 2(a)2.4 Follicular lymphoma                                 | 105             | 5                   | 1.5                 | 3.36#  | 1.08-7.85  | 21.8                     | 1611       | 15.4            | 14.5                 | 40.4            |
| <b>2(a)3 Non-Hodgkin lymphoma, B-cell, NOS</b>              | 300             | 16                  | 5.1                 | 3.14#  | 1.80-5.11  | 19.4                     | 5626       | 18.8            | 11.9                 | 35.1            |

|                                                     |     |    |     |       |            |      |      |      |      |      |
|-----------------------------------------------------|-----|----|-----|-------|------------|------|------|------|------|------|
| <b>2(b) Non-Hodgkin lymphoma, T-cell</b>            | 623 | 15 | 2.3 | 6.44# | 3.60-10.62 | 23.4 | 5414 | 8.7  | 12.0 | 23.8 |
| <b>2(b)1 Precursor Non-Hodgkin lymphoma, T-cell</b> | 199 | 3  | 0.3 | 9.10# | 1.83-26.59 | 22.0 | 1213 | 6.1  | 10.4 | 16.0 |
| <b>2(b)2 Mature Non-Hodgkin lymphoma, T-cell</b>    | 424 | 12 | 2.0 | 6.00# | 3.10-10.48 | 23.8 | 4201 | 9.9  | 12.8 | 25.7 |
| 2(b)2.1 Mycosis fungoides                           | 94  | 5  | 0.6 | 9.08# | 2.93-21.19 | 48.4 | 919  | 9.8  | 13.5 | 28.5 |
| 2(b)2.2 Peripheral T-cell lymphoma                  | 324 | 7  | 1.4 | 4.86# | 1.95-10.00 | 17.1 | 3252 | 10.0 | 12.6 | 23.8 |
| Peripheral T-cell lymphoma, NOS                     | 66  | 3  | 0.4 | 6.91# | 1.39-20.19 | 31.5 | 813  | 12.3 | 11.3 | 25.9 |
| Anaplastic lar cell lymph, T-/Null-cell             | 185 | 3  | 0.8 | 3.79  | 0.76-11.09 | 11.8 | 1880 | 10.2 | 12.5 | 22.2 |
| Cutaneous T-cell lymphoma, NOS                      | 27  | 1  | 0.1 | 10.24 | 0.13-56.97 | 35.7 | 252  | 9.4  | 14.1 | 22.3 |
| <b>2(c) Non-Hodgkin lymphoma, unknown lineage</b>   | 330 | 16 | 3.3 | 4.90# | 2.80-7.96  | 22.6 | 5647 | 17.1 | 10.2 | 27.6 |
| <b>2(d) Non-Hodgkin lymphoma, NOS</b>               | 162 | 8  | 3.0 | 2.64# | 1.14-5.20  | 17.0 | 2927 | 18.1 | 12.6 | 30.0 |

SPM, second primary malignancy. SIR, standardized incidence ratio. PY, person-year. NOS, not otherwise specified.

#Significant difference was observed ( $P < 0.05$ ).

All results in this table were calculated and analyzed by MP-SIR session of the software SEER\*Stat with a 1-year latency of SPM after the first primary lymphoma.

**Supplemental Table 2.** Multivariate competing-risk analysis of second primary malignancies (SPM) among pediatric lymphoma patients for demographic characteristics.

| Characteristic       | HR        | 95%CI |       | P value          |
|----------------------|-----------|-------|-------|------------------|
|                      |           | Lower | Upper |                  |
| Sex                  |           |       |       |                  |
| Male                 | Reference | -     | -     |                  |
| Female               | 2.51      | 2.08  | 3.04  | <b>&lt;0.001</b> |
| Age, years           |           |       |       |                  |
| <1                   | 1.86      | 0.21  | 16.60 | 0.58             |
| 1-4                  | Reference | -     | -     | -                |
| 5-9                  | 0.88      | 0.45  | 1.72  | 0.72             |
| 10-14                | 1.35      | 0.73  | 2.48  | 0.34             |
| 15-19                | 1.54      | 0.85  | 2.81  | 0.16             |
| Race                 |           |       |       |                  |
| White                | Reference | -     | -     | -                |
| Black                | 1.21      | 0.89  | 1.65  | 0.23             |
| Other†               | 1.25      | 0.81  | 1.92  | 0.32             |
| Unspecified          | NA        | NA    | NA    | NA               |
| Lymphoma subtype     |           |       |       |                  |
| Hodgkin lymphoma     | Reference | -     | -     | -                |
| Non-Hodgkin lymphoma | 0.66      | 0.51  | 0.86  | <b>0.002</b>     |
| Ann Arbor stage      |           |       |       |                  |
| Stage I              | Reference | -     | -     | -                |
| Stage II             | 0.78      | 0.57  | 1.07  | 0.12             |
| Stage III            | 0.92      | 0.62  | 1.36  | 0.68             |
| Stage IV             | 0.94      | 0.63  | 1.38  | 0.74             |
| Unstaged             | NA        | NA    | NA    | NA               |
| Chemotherapy         |           |       |       |                  |
| No                   | Reference | -     | -     |                  |
| Yes                  | 0.94      | 0.77  | 1.16  | 0.58             |
| Radiotherapy         |           |       |       |                  |
| No                   | Reference | -     | -     | -                |
| Yes                  | 1.42      | 1.15  | 1.74  | <b>0.001</b>     |
| Unspecified          | NA        | NA    | NA    | NA               |

†Other in race correspond to American Indian/AK Native, Asian/Pacific Islander. The results in this table were calculated and analyzed by R software with package “cmprsk” and “survival”.

**Supplemental Figure 1.** Cumulative incidence of SPM by multivariate competing-risk analysis among pediatric lymphoma patients distributed by year of diagnosis. A. Follow up of 10 years; B. Follow up of 20 years; C. Follow up of 30 years

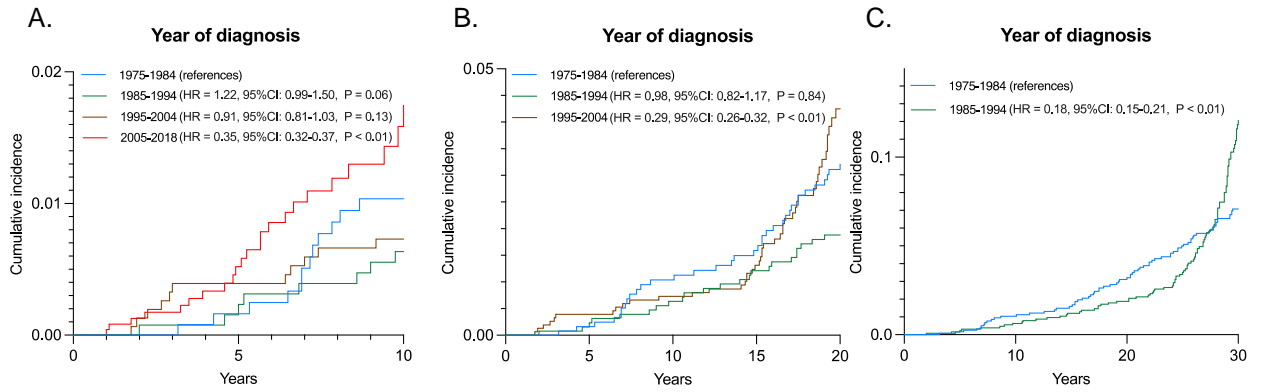

Supplement: MOESM1 [file 26667198]
